# Supplementary material for: Additive Potentiation of R334W-CFTR Function by Novel Small Molecules
Source: J Pers Med. 2023 Jan 1;13(1):102. doi: 10.3390/jpm13010102 (PMC9862739; doi:10.3390/jpm13010102)
Supplement: Supplementary file 1 [file jpm-13-00102-s001.zip › jpm-2041440-supplementary.pdf]

# Additive Potentiation of R334W-CFTR Function by Novel Small Molecules

Mafalda Bacalhau <sup>1</sup>, Filipa C. Ferreira <sup>1</sup>, Iris A. L. Silva <sup>1</sup>, Camilla D. Buarque <sup>2</sup>, Margarida D. Amaral <sup>1</sup> and Miquéias Lopes-Pacheco <sup>1,\*</sup>

<sup>1</sup> Biosystems & Integrative Sciences Institute, Faculty of Sciences, University of Lisbon, 1749-016 Lisbon, Portugal

<sup>2</sup> Department of Chemistry, Pontifical Catholic University of Rio de Janeiro, 22541-041 Rio de Janeiro, Brazil

\* Correspondence: mlpacheco@fc.ul.pt

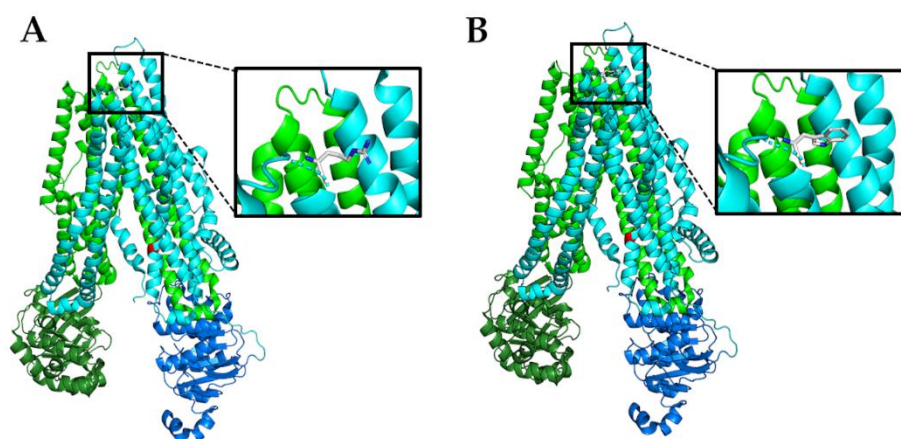

**Figure S1.** Ribbon diagram of the dephosphorylated, ATP-free human CFTR structure (PDB: 5UAK) demonstrating the location of the R334 residue in WT-CFTR (**A**) and mutant R334W-CFTR (**B**).

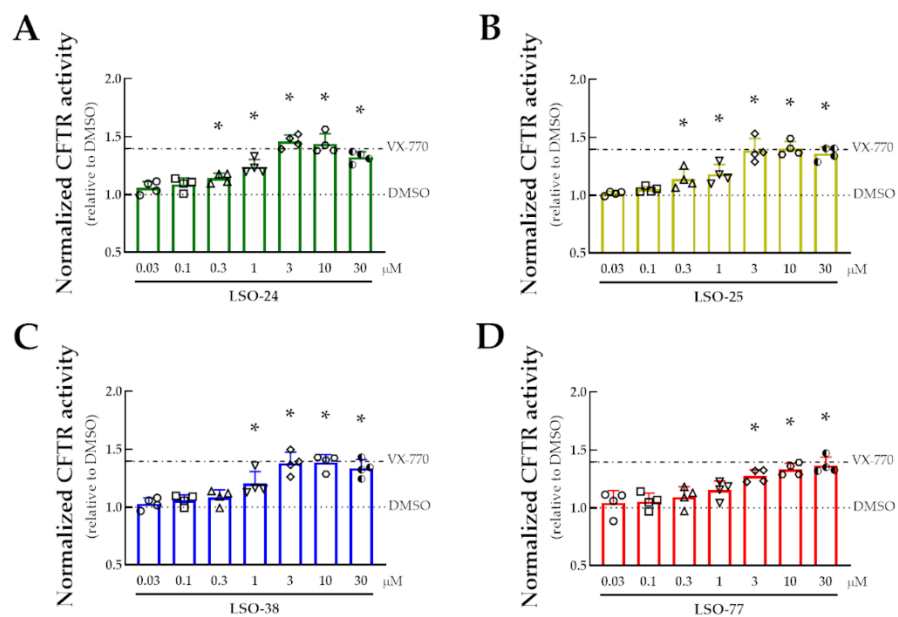

**Figure S2.** Dose-response relationships for the compounds (A) LSO-24, (B) LSO-25, (C) LSO-38 and (D) LSO-77 were determined by the HS-YFP assay on a plate reader in CFBE cells expressing R334W-CFTR. \*P < 0.05 *vs.* DMSO.

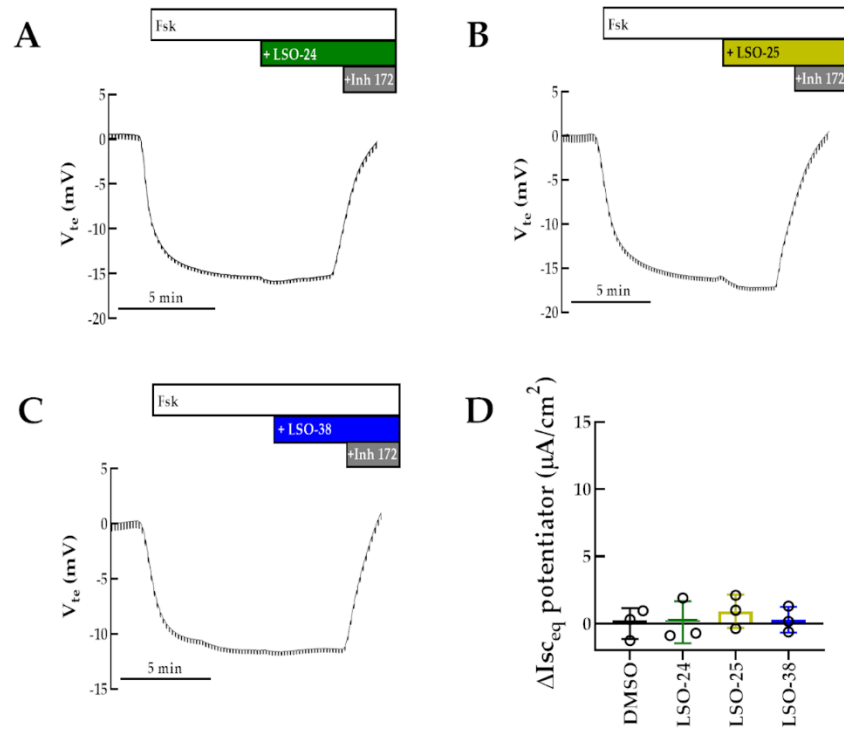

**Figure S3.** (A–C) Representative Ussing chamber (open-circuit) recording representing transepithelial voltage measurements ( $V_{te}$ ) of polarized monolayers of CFBE cells expressing WT-CFTR. Cells were acutely subsequently stimulated with Fsk (0.128  $\mu$ M), test compounds (DMSO, 5  $\mu$ M LSO-24, 5  $\mu$ M LSO-25 or 5  $\mu$ M LSO-38) and CFTRInh-172 (30  $\mu$ M). (D) Data are represented as mean (+ SD) increase in  $I_{eq}$  promoted by test potentiator.
